# Supplementary material for: Three-Year Outcomes of Neovascular Age-Related Macular Degeneration in Eyes That Do Not Develop Macular Atrophy or Subretinal Fibrosis
Source: PubMed Central journal article supplement (PMC8572511; doi:10.1167/tvst.10.13.5), 2021-11-03
Supplement: tvst-10-13-5_s001.pdf [file tvst-10-13-5_s001.pdf]

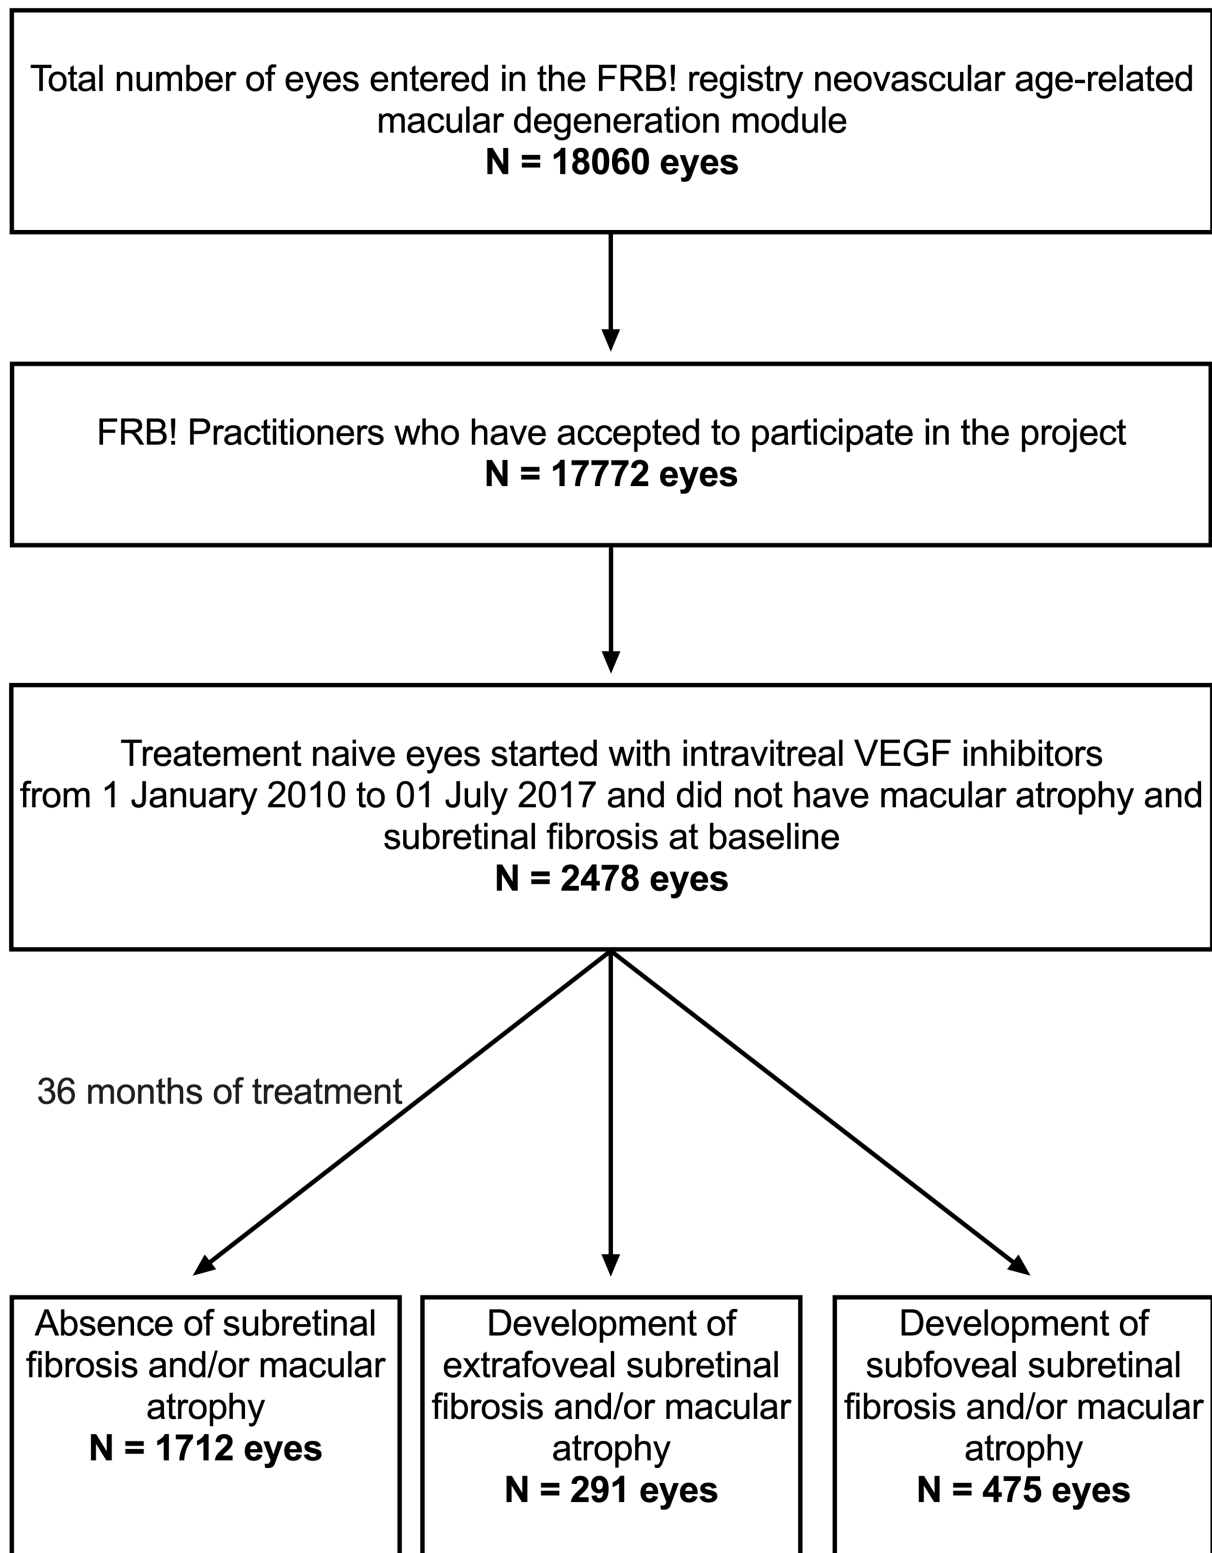

**Figure S1.** Flow chart showing the number of eyes remaining at each selection criterion.
