# Supplementary material for: Three-Year Outcomes of Neovascular Age-Related Macular Degeneration in Eyes That Do Not Develop Macular Atrophy or Subretinal Fibrosis
Source: PubMed Central journal article supplement (PMC8572511; doi:10.1167/tvst.10.13.5), 2021-11-03
Supplement: tvst-10-13-5_s002.pdf [file tvst-10-13-5_s002.pdf]

### Kaplan-Meier plot for time to dropout

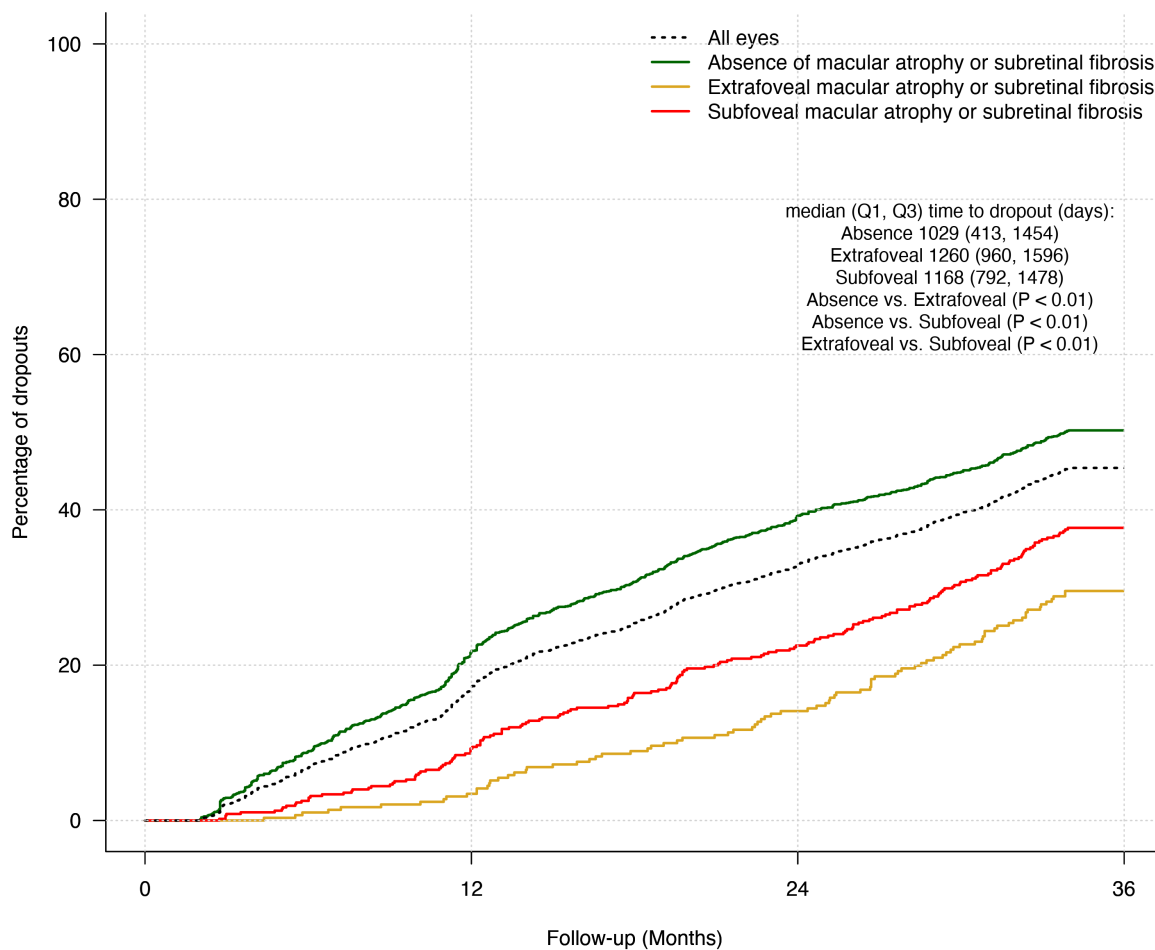

**Figure S2.** Kaplan-Meier plots for time from starting treatment to drop-out in all eyes (black dashed line) and according to the development of macular atrophy and/or subretinal fibrosis and its location during treatment (absence [green], extrafoveal [gold] and subfoveal [red]) over 36 months.
