# Supplementary material for: Three-Year Outcomes of Neovascular Age-Related Macular Degeneration in Eyes That Do Not Develop Macular Atrophy or Subretinal Fibrosis
Source: PubMed Central journal article supplement (PMC8572511; doi:10.1167/tvst.10.13.5), 2021-11-03
Supplement: tvst-10-13-5_s003.pdf [file tvst-10-13-5_s003.pdf]

### Comparison of the mean visual acuity at baseline with the last observed per year of dropout

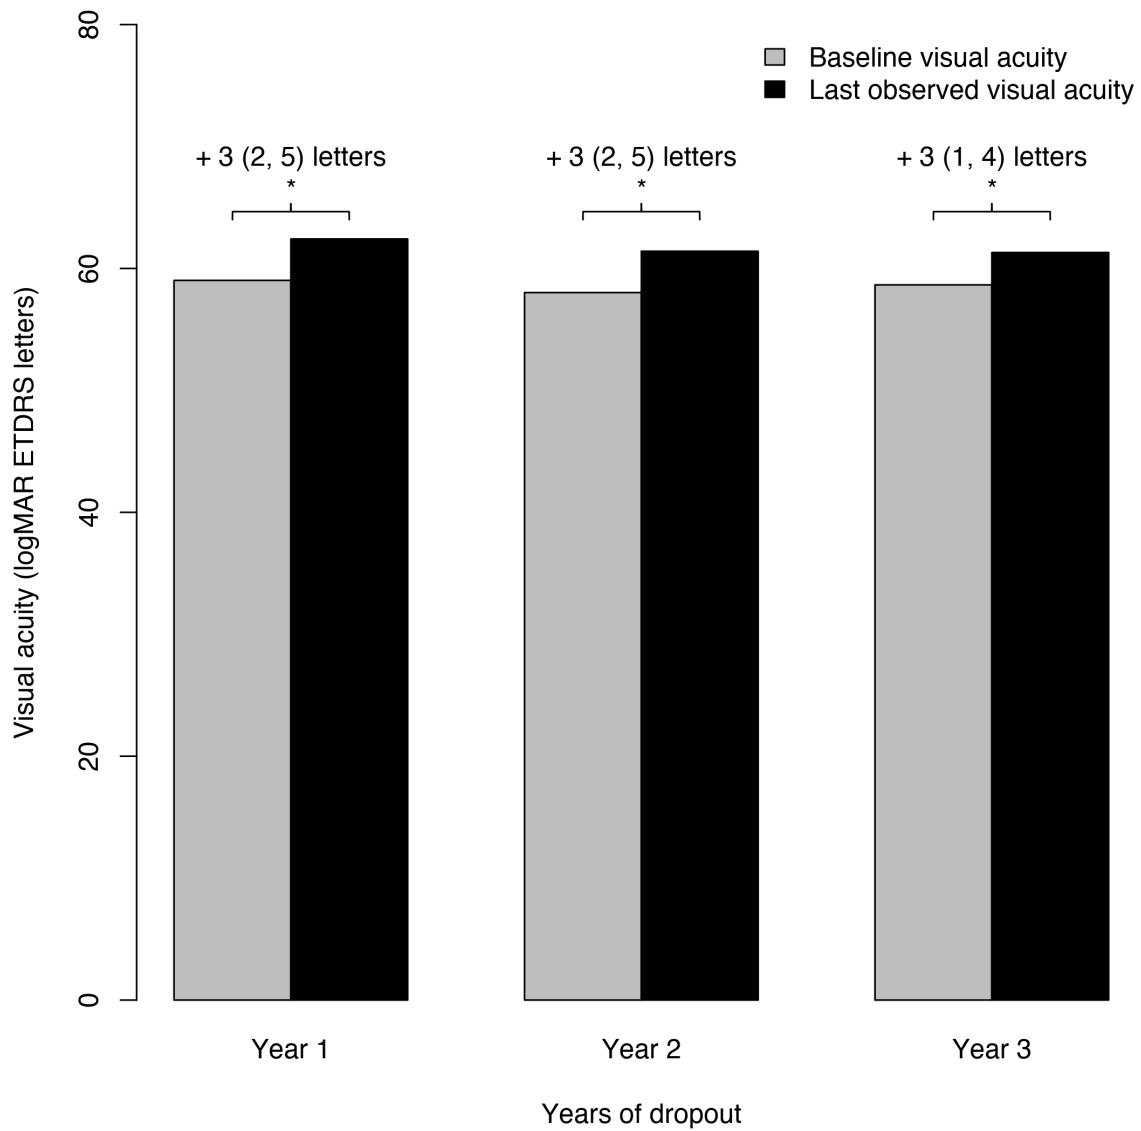

**Figure S3.** Comparison of the mean visual acuity in LogMAR letters at baseline (grey) with the last observed mean visual acuity (black) in eyes of patients who dropped out each year of follow-up.
