# Supplementary material for: Three-Year Outcomes of Neovascular Age-Related Macular Degeneration in Eyes That Do Not Develop Macular Atrophy or Subretinal Fibrosis
Source: PubMed Central journal article supplement (PMC8572511; doi:10.1167/tvst.10.13.5), 2021-11-03
Supplement: tvst-10-13-5_s004.pdf [file tvst-10-13-5_s004.pdf]

**Table S1.** 36-month visual outcomes stratified by cataract extraction and the development of macular atrophy (MA) and/or subretinal fibrosis (SRFi) and its location in baseline phakic eyes.

|                                                                           | 36 months of follow-up                                                   |                     |                 |
|---------------------------------------------------------------------------|--------------------------------------------------------------------------|---------------------|-----------------|
|                                                                           | of eyes <b>without</b> subretinal fibrosis and/or macular atrophy        |                     |                 |
|                                                                           | No cataract extraction                                                   | Cataract extraction | P               |
| Eyes                                                                      | 1248                                                                     | 100                 |                 |
| Patients                                                                  | 1163                                                                     | 95                  |                 |
| Time to cataract extraction days, median (Q1, Q3)                         | -                                                                        | 541 (300, 798)      | -               |
| Baseline VA letters, mean (SD)                                            | 63 (17)                                                                  | 60 (16)             | <b>&lt;0.01</b> |
| 6 months VA letters, mean (SD)                                            | 69 (15)                                                                  | 64 (16)             | <b>&lt;0.01</b> |
| Crude VA change from baseline to 6 months letters, mean (95% CI)          | +6 (5, 6)                                                                | +4 (2, 7)           | 0.49            |
| Final VA, mean (SD)                                                       | 68 (17)                                                                  | 71 (11)             | <b>0.020</b>    |
| Crude VA change at 36 months letters, mean (95% CI) <sup>a</sup>          |                                                                          |                     |                 |
| <i>From baseline</i>                                                      | +4 (3, 5)                                                                | +12 (9, 15)         | <b>&lt;0.01</b> |
| <i>From 6 months</i>                                                      | -1 (-2, -1)                                                              | +7 (4, 10)          | <b>&lt;0.01</b> |
| VA maintained from 6 months at 36 months (VA change $\geq$ -5 letters), % | 79                                                                       | 88                  | <b>0.03</b>     |
| VA loss from 6 months at 36 months $\geq$ 10 letters, %                   | 14                                                                       | 7                   | 0.06            |
| VA loss from 6 months at 36 months $\geq$ 15 letters, %                   | 8                                                                        | 2                   | <b>0.04</b>     |
|                                                                           | 36 months of follow-up                                                   |                     |                 |
|                                                                           | of eyes with <b>subfoveal</b> subretinal fibrosis and/or macular atrophy |                     |                 |
|                                                                           | No cataract extraction                                                   | Cataract extraction | P               |
| Eyes                                                                      | 288                                                                      | 44                  |                 |
| Patients                                                                  | 278                                                                      | 42                  |                 |
| Time to cataract extraction days, median (Q1, Q3)                         | -                                                                        | 553 (372, 816)      |                 |
| Baseline VA letters, mean (SD)                                            | 52 (22)                                                                  | 47 (26)             | 0.23            |
| 6 months VA letters, mean (SD)                                            | 57 (22)                                                                  | 52 (22)             | 0.19            |
| Crude VA change from baseline to 6 months letters, mean (95% CI)          | +5 (3, 7)                                                                | +5 (-1, 11)         | 0.93            |
| Final VA, mean (SD)                                                       | 49 (25)                                                                  | 46 (29)             | 0.41            |
| Crude VA change at 36 months letters, mean (95% CI) <sup>a</sup>          |                                                                          |                     |                 |
| <i>From baseline</i>                                                      | -2 (-5, 1)                                                               | -1 (-9, 6)          | 0.81            |

|                                                                           |              |             |      |
|---------------------------------------------------------------------------|--------------|-------------|------|
| <i>From 6 months</i>                                                      | -7 (-10, -5) | -6 (-14, 2) | 0.72 |
| VA maintained from 6 months at 36 months (VA change $\geq$ -5 letters), % | 61           | 63          | 0.64 |
| VA loss from 6 months at 36 months $\geq$ 10 letters, %                   | 35           | 36          | 0.95 |
| VA loss from 6 months at 36 months $\geq$ 15 letters, %                   | 27           | 34          | 0.40 |

|                                                                           | 36 months of follow-up                                                     |                     |                 |
|---------------------------------------------------------------------------|----------------------------------------------------------------------------|---------------------|-----------------|
|                                                                           | of eyes with <b>extrafoveal</b> subretinal fibrosis and/or macular atrophy |                     | P               |
|                                                                           | No cataract extraction                                                     | Cataract extraction |                 |
| Eyes                                                                      | 192                                                                        | 23                  |                 |
| Patients                                                                  | 179                                                                        | 22                  |                 |
| Time to cataract extraction days, median (Q1, Q3)                         | -                                                                          | 455 (262, 780)      |                 |
| Baseline VA letters, mean (SD)                                            | 62 (17)                                                                    | 56 (16)             | 0.09            |
| 6 months VA letters, mean (SD)                                            | 69 (14)                                                                    | 65 (11)             | 0.24            |
| Crude VA change from baseline to 6 months letters, mean (95% CI)          | +7 (5, 9)                                                                  | +9 (2, 17)          | 0.38            |
| Final VA, mean (SD)                                                       | 65 (18)                                                                    | 73 (11)             | <b>0.036</b>    |
| Crude VA change at 36 months letters, mean (95% CI) <sup>a</sup>          |                                                                            |                     |                 |
| <i>From baseline</i>                                                      | +3 (0, 5)                                                                  | +17 (8, 26)         | <b>&lt;0.01</b> |
| <i>From 6 months</i>                                                      | -4 (-6, -2)                                                                | +8 (2, 13)          | <b>&lt;0.01</b> |
| VA maintained from 6 months at 36 months (VA change $\geq$ -5 letters), % | 66                                                                         | 91                  | <b>&lt;0.01</b> |
| VA loss from 6 months at 36 months $\geq$ 10 letters, %                   | 23                                                                         | 4                   | 0.065           |
| VA loss from 6 months at 36 months $\geq$ 15 letters, %                   | 17                                                                         | 4                   | 0.21            |

SD, standard deviation; Q1, first quartile; Q3, third quartile; CI, confidence interval; VA, visual acuity (logMAR letters).

<sup>a</sup>Last observation carried forward for non-completers.

Significant p-values are highlighted in bold.
